# Supplementary material
Source: PubMed Central journal article supplement (PMC3153346)

### **Supplemental Figure 1.**

**IRAK-M<sup>-/-</sup> DCs show enhanced activity following stimulation through multiple TLRs.** DCs were stimulated for 1, 3, or 5 days with LPS (100ng/mL), CpG (1 $\mu$ M), PGN (5 $\mu$ g/mL), or left unstimulated as indicated. A: Media was removed and subjected to IL-12p70 ELISA. Results shown are averages of three independent experiments. B: Viable and mature (CD11c+CD80+CD86+) DCs were enumerated using quantitative flow cytometry. Results are shown as fold change relative to unstimulated wildtype DCs, set equal to 1 and indicated by dotted line.

### **Supplemental Figure 2.**

**Vaccination with IRAK-M<sup>-/-</sup> DCs results in an enhanced immune response (cumulative IFN- $\gamma$  data).** Naïve C57BL/6 mice were vaccinated in the left footpad with a single dose of 1x10<sup>6</sup> OVA-pulsed, LPS-matured wildtype or IRAK-M<sup>-/-</sup> DCs, or PBS control. Mice were euthanized at indicated timepoints and inguinal lymph nodes were re-stimulated overnight with OT-I and OT-II peptides (10 $\mu$ g/mL each) with GolgiPlug (brefeldin A) added during the last 6 hours of culture. Cells were harvested, washed, and analyzed by intracellular staining for IFN- $\gamma$ . Each mouse is plotted as a point with 13  $\leq$  n  $\leq$  20 for each day.

# Supplementary Figure 1

A

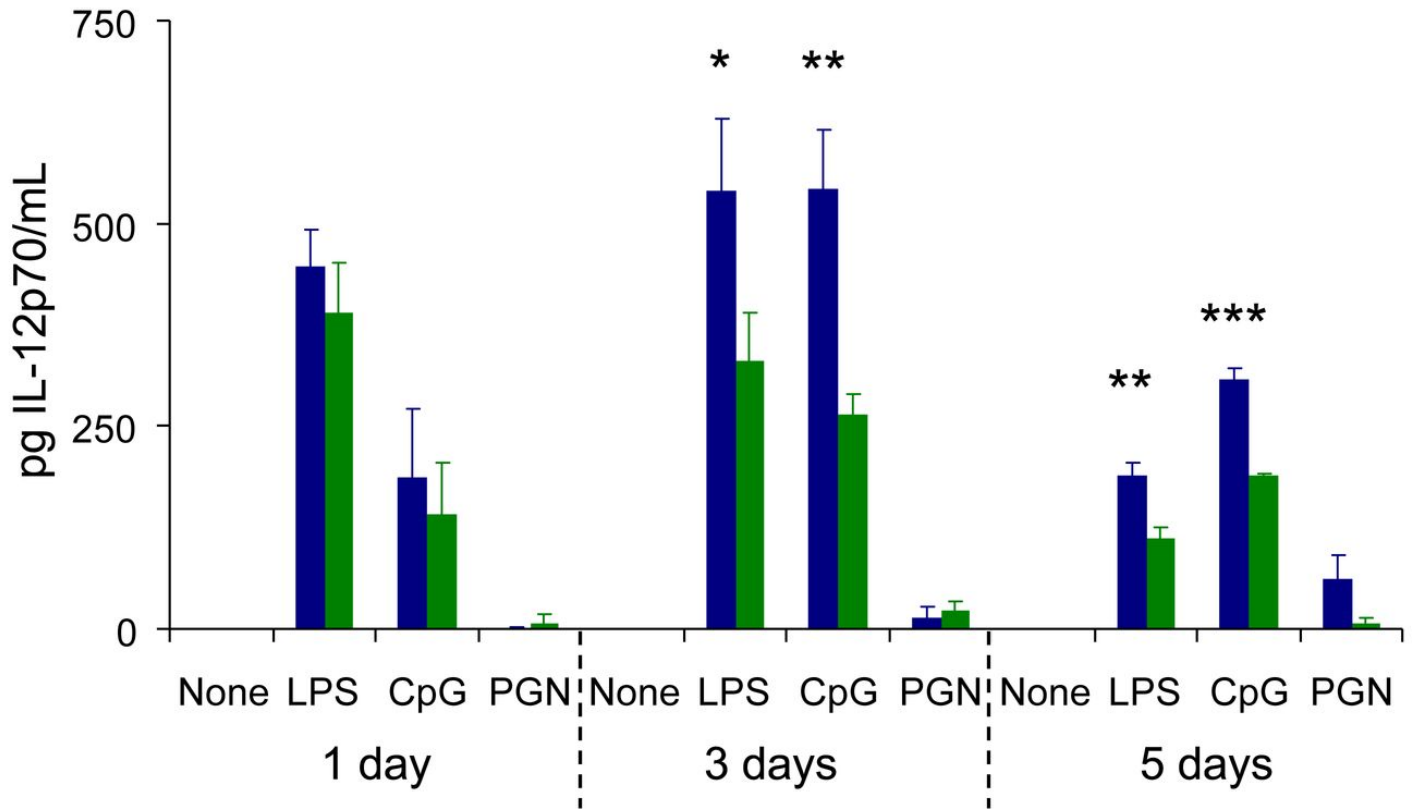

B

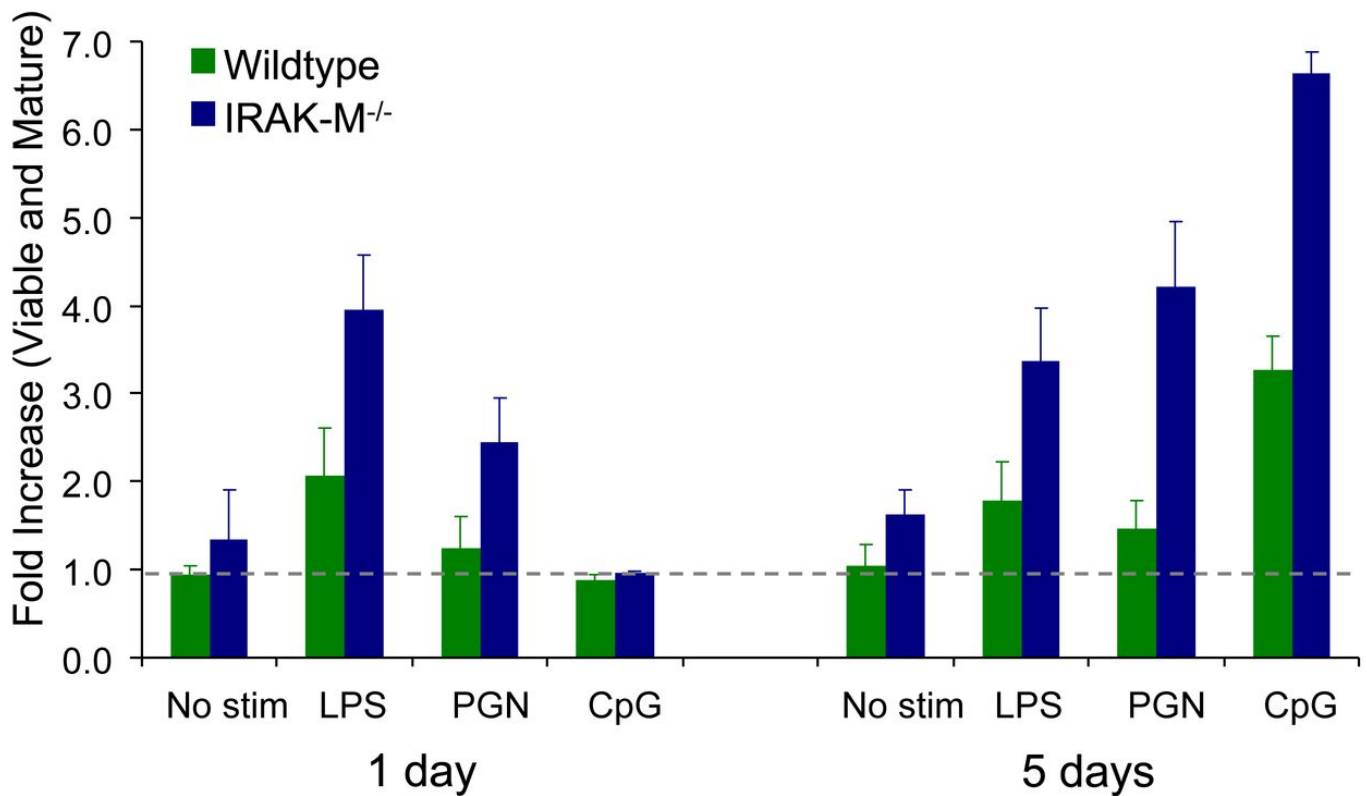

# Supplemental 2

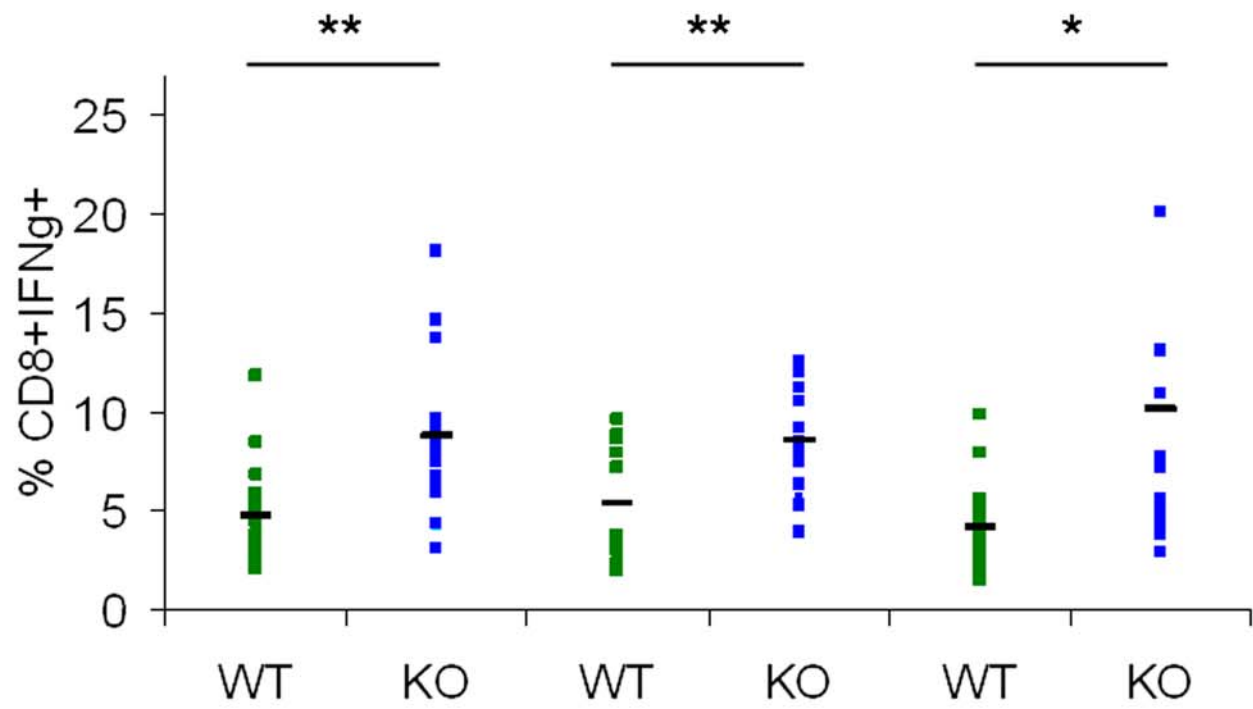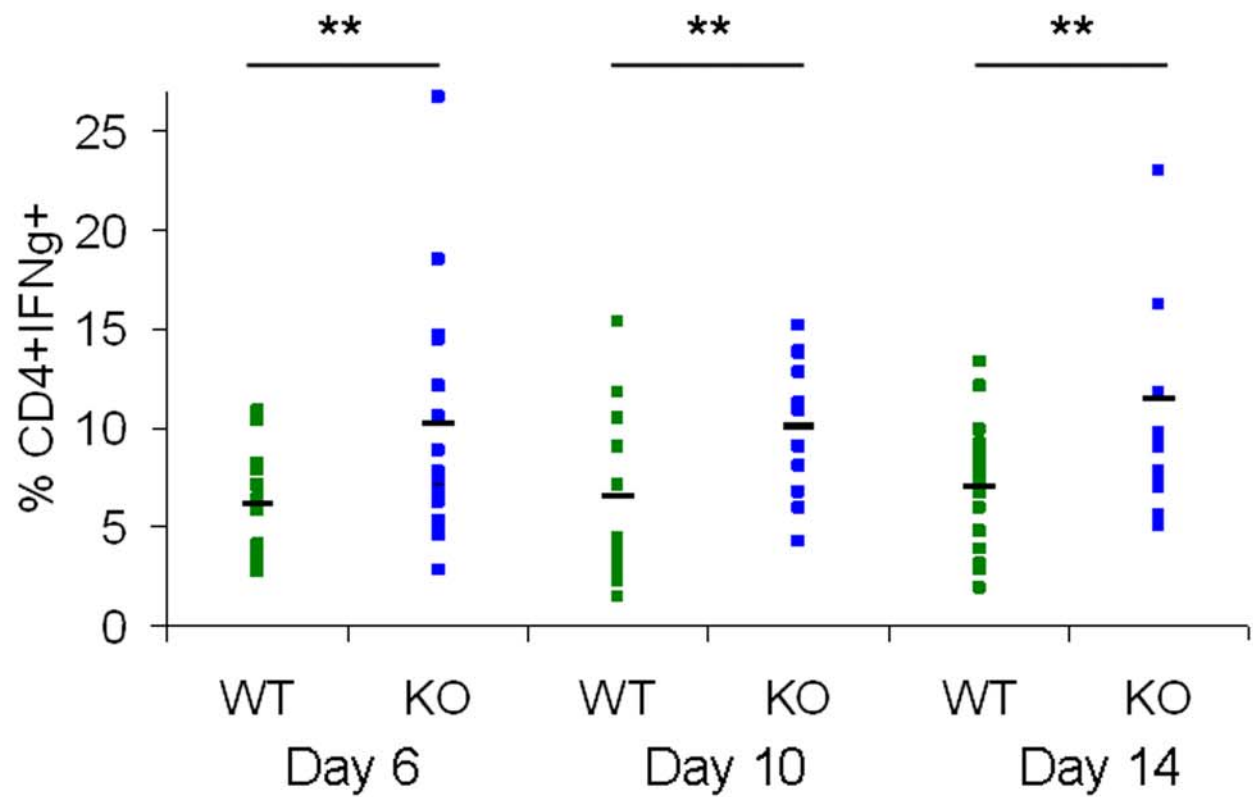

Supplement: NIHMS309715-supplement-2010_IRAK-M_supplemental_pdf.pdf [file NIHMS309715-supplement-2010_IRAK-M_supplemental_pdf.pdf]
